# Supplementary material for: Resilience of the Aurivillius structure upon La and Cr doping in a Bi5Ti3FeO15 multiferroic
Source: Royal Society of Chemistry journal article supplement (doi:10.1039/d4dt00159a), 2024-01-01
Supplement: d4dt00159a1.pdf [file d4dt00159a1.pdf]

Electronic Supplemental Information:

Resilience of the Aurivillius structure upon La and Cr doping in  
 $\text{Bi}_5\text{Ti}_3\text{FeO}_{15}$  multiferroic.

Omar Alejandro Salas, Yohannes W. Getahun, Cein H. Mandujano, Felicia Manciu,  
Mariana Castellanos, Jorge Lopez, Raquel Garza Hernandez, Volodymir B. Buturlim,  
Krzysztof Gofryk, Dhanpal Bairwa, Suja Elizabeth, Harikrishnan S. Nair.

| BTFO   | x      | y       | z      | Occupancy | $U_{\text{iso}}$ |
|--------|--------|---------|--------|-----------|------------------|
| Bi1 4a | 0.2511 | 0.2474  | 0      | 1         | 0.0153           |
| Bi2 8b | 0.2452 | 0.2449  | 0.1047 | 1         | 0.0095           |
| Bi3 8b | 0.2294 | 0.2709  | 0.1044 | 1         | 0.0106           |
| Ti1 8b | 0.2951 | 0.2505  | 0.4507 | 0.75      | 0.0072           |
| Fe1 8b | 0.2951 | 0.2505  | 0.4507 | 0.25      | 0.0072           |
| Ti2 8b | 0.2814 | 0.2501  | 0.3471 | 0.75      | 0.0064           |
| Fe2 8b | 0.2814 | 0.2501  | 0.3471 | 0.25      | 0.0064           |
| O1 4a  | 0.3208 | 0.1754  | 0.5    | 1         | 0.0012           |
| O2 8b  | 0.6056 | 0.5439  | 0.0533 | 1         | 0.0195           |
| O3 8b  | 0.3338 | 0.3072  | 0.4048 | 1         | 0.0076           |
| O4 8b  | 0.5316 | 0.4940  | 0.1385 | 1         | 0.0153           |
| O5 8b  | 0.2974 | 0.2047  | 0.3075 | 1         | 0.0171           |
| O6 8b  | 0.5206 | 0.5004  | 0.2538 | 1         | 0.0082           |
| O7 8b  | 0.0342 | -0.0343 | 0.0392 | 1         | 0.0299           |
| O8 8b  | 0.0989 | 0.0203  | 0.1456 | 1         | 0.0087           |

**Table S1.** The Rietveld-refined atomic parameters of BTFO in the spacegroup  $A2_1am$ . Occupancies were fixed to nominal stoichiometry.

| BLTFO          | <i>x</i> | <i>y</i> | <i>z</i> | Occupancy | $U_{iso}$ |
|----------------|----------|----------|----------|-----------|-----------|
| Bi1 4 <i>a</i> | 0.2732   | 0.2521   | 0        | 1         | 0.0156    |
| Bi2 8 <i>b</i> | 0.2831   | 0.2403   | 0.1048   | 1         | 0.0081    |
| Bi3 8 <i>b</i> | 0.2539   | 0.2709   | 0.2196   | 1         | 0.0106    |
| Ti1 8 <i>b</i> | 0.2773   | 0.2571   | 0.4511   | 0.75      | 0.0063    |
| Fe1 8 <i>b</i> | 0.2692   | 0.2693   | 0.4490   | 0.25      | 0.0063    |
| Ti2 8 <i>b</i> | 0.2337   | 0.2552   | 0.3444   | 0.75      | 0.0063    |
| Fe2 8 <i>b</i> | 0.2297   | 0.2639   | 0.3435   | 0.25      | 0.0063    |
| O1 4 <i>a</i>  | 0.3033   | 0.2227   | 0.5      | 1         | 0.0012    |
| O2 8 <i>b</i>  | 0.5407   | 0.6016   | 0.0498   | 1         | 0.008     |
| O3 8 <i>b</i>  | 0.3121   | 0.2887   | 0.4107   | 1         | 0.0146    |
| O4 8 <i>b</i>  | 0.5198   | 0.4356   | 0.1349   | 1         | 0.0018    |
| O5 8 <i>b</i>  | 0.3425   | 0.2194   | 0.3113   | 1         | 0.0322    |
| O6 8 <i>b</i>  | 0.4909   | 0.4765   | 0.2561   | 1         | 0.0093    |
| O7 8 <i>b</i>  | 0.0474   | 0.0202   | 0.0403   | 1         | 0.0188    |
| O8 8 <i>b</i>  | 0.0426   | -0.0902  | 0.1448   | 1         | 0.0248    |
| La1 4 <i>a</i> | 0.2732   | 0.2521   | 0        | 1         | 0.0156    |
| La2 8 <i>b</i> | 0.2831   | 0.2403   | 0.1048   | 1         | 0.0081    |
| La3 8 <i>b</i> | 0.2539   | 0.2709   | 0.2196   | 1         | 0.0106    |

**Table S2.** The Rietveld-refined atomic parameters of BLTFO in the spacegroup  $A2_1am$ . Occupancies were fixed to nominal stoichiometry.

| BTFCO          | <i>x</i> | <i>y</i> | <i>z</i> | Occupancy | $U_{iso}$ |
|----------------|----------|----------|----------|-----------|-----------|
| Bi1 4 <i>a</i> | 0.2470   | 0.2656   | 0        | 1         | 0.0139    |
| Bi2 8 <i>b</i> | 0.2420   | 0.2367   | 0.1039   | 1         | 0.0092    |
| Bi3 8 <i>b</i> | 0.2285   | 0.2459   | 0.2188   | 1         | 0.012     |
| Ti1 8 <i>b</i> | 0.2893   | 0.2458   | 0.4502   | 0.75      | 0.012     |
| Fe1 8 <i>b</i> | 0.2893   | 0.2458   | 0.4502   | 0.125     | 0.012     |
| Ti2 8 <i>b</i> | 0.2920   | 0.2283   | 0.3468   | 0.75      | 0.012     |
| Fe2 8 <i>b</i> | 0.2920   | 0.2283   | 0.3468   | 0.25      | 0.012     |
| O1 4 <i>a</i>  | 0.3236   | 0.1951   | 0.5      | 1         | 0.0012    |
| O2 8 <i>b</i>  | 0.5817   | 0.5529   | 0.0502   | 1         | 0.012     |
| O3 8 <i>b</i>  | 0.3584   | 0.3047   | 0.4055   | 1         | 0.0278    |
| O4 8 <i>b</i>  | 0.5429   | 0.5053   | 0.1349   | 1         | 0.0407    |
| O5 8 <i>b</i>  | 0.3034   | 0.2194   | 0.3055   | 1         | 0.0273    |
| O6 8 <i>b</i>  | 0.5528   | 0.4818   | 0.2551   | 1         | 0.0120    |
| O7 8 <i>b</i>  | -0.0239  | -0.0613  | 0.0393   | 1         | 0.0111    |
| O8 8 <i>b</i>  | 0.0849   | -0.0182  | 0.1494   | 1         | 0.0420    |
| Cr1 8 <i>b</i> | 0.2893   | 0.2458   | 0.4502   | 0.125     | 0.010     |
| Cr2 8 <i>b</i> | 0.2920   | 0.2283   | 0.3468   | 0.125     | 0.010     |

**Table S3.** The Rietveld-refined atomic parameters of BTFCO in the spacegroup  $A2_1am$ . Occupancies were fixed to nominal stoichiometry.

|              | BTFO             | BTFCO                | BLTFO            |
|--------------|------------------|----------------------|------------------|
| Bi1-Bi1      | 3.853(7)         | 3.83(3)              | 3.833(3)         |
| Bi1-Bi2      | 4.3142(8)        | 4.2721(17)           | 4.3273(8)        |
| Bi1-O1       | 2.31(3), 2.38(3) | 2.292(15), 2.379(12) | 2.48(4), 2.46(4) |
| Bi1-O2       | 2.45(3)          | 2.438(8)             | 2.52(3)          |
| Bi1-O7       | 2.48(3)          | 2.473(10)            | 2.43(3)          |
| Ti1/Fe1-O1   | 2.030(7)         | 2.01926(8)           | 2.068(8)         |
| Ti1/Fe1-O2   | 1.99(3)          | 1.86126(12)          | 1.90(3)          |
| Ti1/Fe1-O3   | 2.035(14)        | 2.02279(9)           | 1.892(13)        |
| Ti1/Fe1-O7   | 2.28(4)          | 2.27987(3)           | 2.24(4)          |
| ∠ Ti1-O7-Ti1 | 153.8(13)        | 153.8833(11)         | 154.2(12)        |
| ∠ Ti1-O3-Ti2 | 156.1(13)        | 155.9009(12)         | 154.4(12)        |
| ∠ Ti2-O8-Ti2 | 169.1(13)        | 169.2103(8)          | 157.7(13)        |

**Table S4.** Selected bond parameters of BTFO, BTFCO and BLTFO obtained from the Rietveld refinement of synchrotron X-ray diffraction data. The distances are in the units of Å and the angles are in degrees.
